# Supplementary material for: Differential detergent sensitivity of extracellular vesicle subpopulations
Source: Royal Society of Chemistry journal article supplement (doi:10.1039/c5ob01451d), 2015-01-01
Supplement: c5ob01451d1.pdf [file c5ob01451d1.pdf]

## Supplementary data

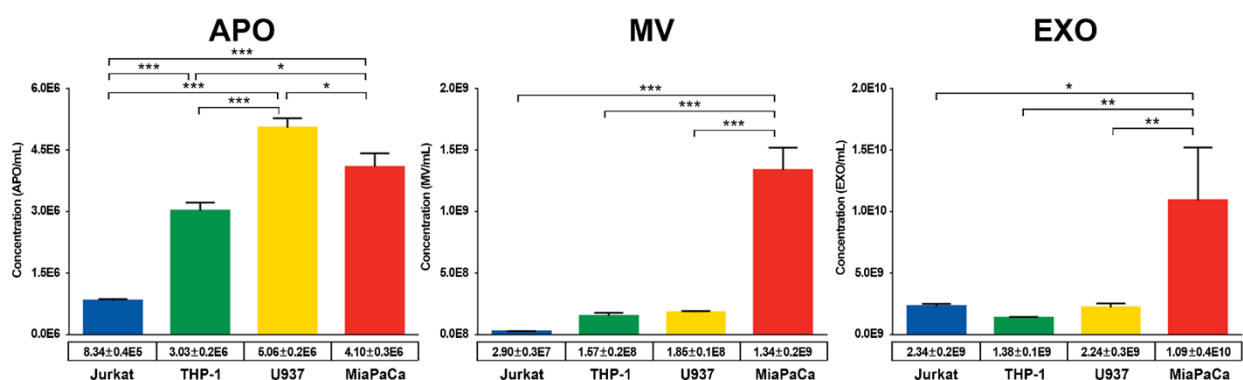

Supplementary Figure 1 shows concentrations of different size-based EV subpopulations found in the serum-free conditioned media of Jurkat, THP-1, U937 and MiaPaCa human cell lines. The mean values  $\pm$  SEM of EV concentrations (EV/mL) of conditioned media are reported below each respective EV subpopulation for the different cell lines. Concentrations were compared by one-way ANOVA. \*  $p < 0.05$ , \*\*  $p < 0.01$  and \*\*\*  $p < 0.001$

As shown in the figure, MiaPaCa cells produced significantly higher amount of both MVs and EXOs as compared to the other three cell lines. In contrast, significantly different amounts of APOs were produced by the four cell lines.
